# Supplementary material
Source: PubMed Central journal article supplement (PMC8242565)
Supplement: JOIM-290-444-s001.pdf [file JOIM-290-444-s001.pdf]

**Table S1. The follow-up symptoms.**

| Characteristics        | Number<br>(n=796) | Percentage<br>(%) |
|------------------------|-------------------|-------------------|
| Any symptoms           | 441               | 55.4              |
| 0-1 symptoms           | 534               | 67.1              |
| >1 symptoms            | 262               | 32.9              |
| Cough                  | 99                | 12.4              |
| Throat itching         | 11                | 1.4               |
| Shortness of breath    | 162               | 20.4              |
| Chest pains            | 79                | 9.9               |
| New hypertension       | 3                 | 0.4               |
| Digestive symptoms     | 87                | 10.9              |
| Dizziness and headache | 15                | 1.9               |
| Muscle joint pain      | 110               | 13.8              |
| Backache               | 16                | 2.0               |
| Hypomnesia             | 69                | 8.7               |
| Sleep disorder         | 185               | 23.2              |
| Fatigue                | 201               | 25.3              |
| Hair loss              | 4                 | 0.5               |
| Sweat                  | 9                 | 1.1               |
| Mental symptoms        | 8                 | 1.0               |
